# Supplementary material
Source: HighWire-hosted journal article supplement (https://gut.bmj.com/content/71/5/889)
Supplement: inline-supplementary-material-8 [file inline-supplementary-material-8.pdf]

## Supplementary Figure 3

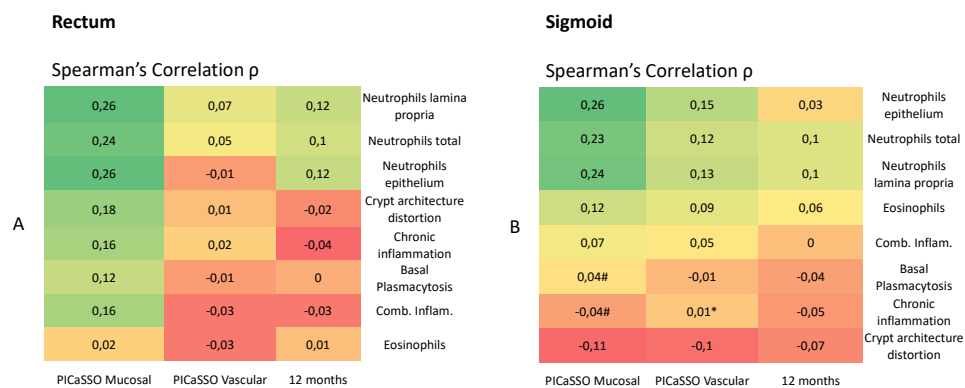

## Supplementary Figure 3 Correlation of histopathologic components in patients in endoscopic remission (MES 0)

Heatmaps showing the correlations of histopathologic components with PiCaSSO endoscopic subscores and with the rates of 12-month adverse outcomes in patients in endoscopic remission (MES = 0). Biopsies from the **rectum (A)** and the **sigmoid (B)**. (0.8-1.0: very strong correlation, 0.6-0.79: strong, 0.40-0.59: moderate, 0.2-0.39: weak) (\* $p < 0.05$  as compared to neutrophils in the lamina propria, # $p < 0.05$  as compared to and total neutrophils infiltration, and # $p < 0.05$  as compared to neutrophils in epithelium, with regard to the correlation strength in the same category of correlation analysis) (Neutrophils total: neutrophil infiltration in both lamina propria and epithelium)
